# Supplementary material for: New Insights into Potocki-Shaffer Syndrome: Report of Two Novel Cases and Literature Review
Source: MDPI journal article supplement (doi:10.3390/brainsci10110788), 2020-10-28
Supplement: s1 [file s1]

*Decipher patient 286390*

**EEG performed during hospitalization because of a status epilepticus secondary to a Haemophilus influenzae septic shock**

-04.04.2012: Clinical status epilepticus

Treatment: Rivotril (clonazepam); Diprivan (Propofol); Lamictal (Lamotrigine);

The pattern begins with a rhythmic spike-wave discharge more apparent at the frontal lobe, with episodes of clinical chewing. It has been decided to inject 1mg of Rivotril (at 10:7:53 a.m). The injection appears to be ineffective. Rhythmic spikes still persist, confirming the epileptic condition. A second injection of 1mg of Rivotril (at 10:13:33 a.m.) has been given, which has slightly modified the rhythmic waves, giving a a less jerky appearance, but spikes and waves discharges still persisted, especially on the right side. Status epilepticus. Low effectiveness of the 2 injections of Rivotril.

-05.04.2012: Control

Treatment: Lamictal (lamotrigine), Valium (diazepam), Gardenal (phenobarbital), Rivotril (clonazepam)

Asymmetric background activity is recorded, at the right hemisphere's expense, which appears slower, wider. The activity in the left hemisphere has a mean frequency of 11 to 12 c/s, amplitude 20 $\mu$ V. There are still interictal critical discharges of an epileptic nature with degraded spikes and waves in the parietal, parieto-occipital and temporo-occipital right regions. The interictal elements are -registered pseudo-periodically every 2 to 3 seconds. The recording shows no evidence of critical rhythmic activity.

-07.04.2012: Control

Treatment: Diprivan (Propofol), Keppra (leviracetam), Lamictal (Lamotrigine)

Asymmetric background activity with straight lateralization signs. The background rhythm is over modulated by medicated fast rhythms and consists of slow waves of 10 to 12 c/s. No recording of spikes or spikes-waves, neither status epilepticus.

-16.04.2012: Control and decrease of Rivotril (Clonazepam) being considered

Treatment: Lamictal (Lamotrigine), Keppra (Leviracetam), Rivotril (Clonazepam)

The pattern starts in standby with a moderately regular, not very active theta activity. We always see some slow waves overloads more specifically in C4-P4. We still note the presence of some fast rhythms in a diffuse way, which can be linked to benzodiazepines. The overall pattern seems to remain not very labile and rather monomorphic. The pattern is quite similar to the previous one (07.04.2012).

| First author /Year            | ArrayCGH/FISH/Microsatellite                         | Phenotype                                                                                                      |                                                                                                                                                                                                                                                                                                                                               |
|-------------------------------|------------------------------------------------------|----------------------------------------------------------------------------------------------------------------|-----------------------------------------------------------------------------------------------------------------------------------------------------------------------------------------------------------------------------------------------------------------------------------------------------------------------------------------------|
|                               |                                                      | Major (cardinal) features                                                                                      | Minor                                                                                                                                                                                                                                                                                                                                         |
| 1) Decipher patient<br>286390 | GRCh37/hg19: 42,333,416-50,378,802                   | Multiple exostosis<br>Developmental delay<br>Intellectual disability<br><b>Epilepsy</b>                        | Large abduction and an external rotation of the two hips;<br>Neonatal hypotonia;<br>Thin corpus callosum<br><br>at birth: W=2970g (-0,87 SD); H=51cm (+0,56 SD); FOC=34cm (-0,54 SD);<br>12 years: W=31 kg (- 3 D.S.); H=134 cm (- 2 D.S.); BMI=17 kg/m <sup>2</sup> (between P25 and P50)                                                    |
| 2) Decipher patient<br>415213 | GRCh37/hg19: 45,670,806 45,993,729<br><i>de novo</i> | Global developmental delay<br>Severe intellectual disability<br><b>Epileptic encephalopathy-<br/>West like</b> | Café-au-lait spots;<br>Benign external hydrocephalus;<br>Bilateral mastoiditis<br><br>born 4060gr (>85 <sup>th</sup> percentile), length 52cm (85 <sup>th</sup> );<br>at 5 year of age weight 23kg (90-97 <sup>th</sup> percentile), height 121cm (>97 <sup>th</sup> percentile), head circumference 53,5 cm (90-97 <sup>th</sup> percentile) |
| 3) McCool et al. 2017         | GRCh37/hg19: 34,027,915-45,104,910<br>unknown        | Multiple exostoses<br>Biparietal foramina<br>History of mild developmental delay                               | Intermittent strabismus due to congenital right superior oblique muscle palsy;<br>Recurrent infections                                                                                                                                                                                                                                        |

|                        |                                                                                                                                                                                                                                                                                    |                                                                                                                       |                                                                                                                                                                                                                                                                                                                                                                                                                                                                          |
|------------------------|------------------------------------------------------------------------------------------------------------------------------------------------------------------------------------------------------------------------------------------------------------------------------------|-----------------------------------------------------------------------------------------------------------------------|--------------------------------------------------------------------------------------------------------------------------------------------------------------------------------------------------------------------------------------------------------------------------------------------------------------------------------------------------------------------------------------------------------------------------------------------------------------------------|
|                        |                                                                                                                                                                                                                                                                                    |                                                                                                                       | 40 week of gestation 3,175 g (15 <sup>th</sup> <P<50 <sup>th</sup> ) and 49 cm (50 <sup>th</sup> )<br>age 4 years 8 months revealed a height and weight at the 96 <sup>th</sup> and 91 <sup>st</sup> centiles and FOC just under the 98 <sup>th</sup> centile                                                                                                                                                                                                            |
| 4) Labonne et al. 2015 | GRCh37/hg19: 45,923,612-46,142,729<br>unknown<br><br>after Real Time qPCR correction:<br>1.STARTS: <i>MAPK8IP1</i> between first and fourth exon: NM_005456; exon 4: 45,923,531-45,923,612 2. ENDS: <i>within</i> '5UTR <i>PHF21A</i> NM_016621; first exon: 46,142,729-46,142,486 | Global developmental delay<br>Craniofacial anomalies                                                                  | Minor limb anomalies; Micropenis; Milled syndactyly; Tapered fingers; Bilateral clinodactyly;<br><br>birth weight of 3.32 kg (25th percentile), a length of 53 cm (75–91th percentile), and an occipitofrontal head circumference of 34.5 cm (25th percentile);<br>22 months, the patient had a weight of 17.28 kg (99.6 <sup>th</sup> percentile), a height of 89.3 cm (98 <sup>th</sup> percentile), and a head circumference of 50.6 cm (75 <sup>th</sup> percentile) |
| 5) Sohn et al. 2014    | GRCh37/hg19: 39,204,770-47,791,278<br>unknown                                                                                                                                                                                                                                      | Multiple exostosis<br>Biparietal foramina<br>Developmental delay<br>Severe intellectual disability<br>Dysmorphic face | Hypotonia; Ptosis; Nystagmus; Strabismus<br><br>after 40 weeks of gestation with birth weight of 2,400 g (<3 <sup>rd</sup> percentile); at age 6 yr, height was 96 cm (<3 <sup>rd</sup> percentile), weight was 15.7 kg (<3 <sup>rd</sup> percentile), and head circumference was 45 cm (<3 <sup>rd</sup> percentile)                                                                                                                                                    |

|                               |                                                                                           |                                                                                                                                             |                                                                                                                                                                                                                                                                                                                                         |
|-------------------------------|-------------------------------------------------------------------------------------------|---------------------------------------------------------------------------------------------------------------------------------------------|-----------------------------------------------------------------------------------------------------------------------------------------------------------------------------------------------------------------------------------------------------------------------------------------------------------------------------------------|
| 6) Kim et al. 2012<br>GC14361 | GRCh37/hg19:33,473,554-47,320,004<br>unknown                                              | Bilateral foramina<br>Midline parietal cortical defect<br>Developmental delay<br>Dysmorphic features<br>Encephalopathy                      | Hypotonia; Sensoneural hearing loss;<br>Unilateral absent testis; Recurrent otitis media; Slight pectus excavatum;<br>Slender fingers; Small phallus (micropenis); Short stature                                                                                                                                                        |
| 7) Montgomery et al. 2012     | GRCh37/hg19: 45,833,960-45,970,465<br><i>de novo</i>                                      | Global developmental delay<br>Subtitle dysmorphic features                                                                                  | Hypotonia;<br>Mild pectus excavatum;<br>Bilateral pes planus<br><br>39 weeks gestation with a birth weight of 4,366 g (95 <sup>th</sup> centile) and birth length of 53 cm (90 <sup>th</sup> centile).<br>at 32 months, height, weight, and head circumference measurements plotted at the 95 <sup>th</sup> –97 <sup>th</sup> centiles. |
| 8) Palka et al. 2012          | GRCh37/hg19: 44,017,269-46,343,049<br>unknown                                             | Developmental delay<br>Multiple Exostoses<br>Severe mental retardation<br>Facial dimorphism<br><b>Epilepsy</b>                              | Birth weight, length and head circumference values within normal parameters                                                                                                                                                                                                                                                             |
| 9) Romeike et al. 2007        | GRCh37/hg19:38,868,079-50,682,194<br>unknown<br>*position from Kim et al.[ <sup>1</sup> ] | Parietal foramen<br>Palpable bony defects in the parietal bones<br>Global developmental delay<br>Intellectual disability<br><b>Seizures</b> | Hypertrophic obstructive cardiomyopathy; Generalized brain atrophy with large ventricles; Focal dysplasia of the cerebellar cortex; Thin corpus callosum; Choroid plexus cholesteatoma; Multiple osteochondromas; Contractures of the                                                                                                   |

|                                                                             |                                                                                                                                                                                                                                      |                                                                                                         |                                                                                                                                                                                                                                                                                                                             |
|-----------------------------------------------------------------------------|--------------------------------------------------------------------------------------------------------------------------------------------------------------------------------------------------------------------------------------|---------------------------------------------------------------------------------------------------------|-----------------------------------------------------------------------------------------------------------------------------------------------------------------------------------------------------------------------------------------------------------------------------------------------------------------------------|
|                                                                             |                                                                                                                                                                                                                                      |                                                                                                         | knees and osteoporosis; Undescended testis; Anemia and thrombocytopenia;<br><i>Deceased from septic toxic cardiac arrest</i>                                                                                                                                                                                                |
| <b>10) Bremond et al. 2005</b>                                              |                                                                                                                                                                                                                                      |                                                                                                         |                                                                                                                                                                                                                                                                                                                             |
| <b>Patient 1 (WAGR+PSS)</b>                                                 | <b>GRCh37/hg19:30,038,577-44,205,103</b><br>unknown; FISH<br><br>*D11S151- RP11-104M24<br>*additional position from Crolla et al.[?]<br>CO8160 (D11S151, KCNA4)<br>KCNA4:30,031,288-30,038,577<br>RP11-104M24: 44,205,103-44,357,631 | Multiple exostosis<br>Facial dysmorphism<br>Mental retardation associated with mood disorders           | <b>Bilateral aniridia; Left kidney tumor;</b><br>Ptosis; Horizontal nystagmus;<br>Cataract; Diffuse corneal opacities;<br>Bilateral aphakia; Ocular hypertension;<br>Severe truncal obesity;<br><br>When examined at age 25, the patient was 150cm tall (-2.4 SD), weighted 95 kg (+7 SD) and had an OFC of 55 cm (median). |
| <b>11) Chuang et al. 2005</b>                                               |                                                                                                                                                                                                                                      |                                                                                                         |                                                                                                                                                                                                                                                                                                                             |
| <b>Patient 1</b><br><b>Interstitial deletion</b><br><b>11(p11.12p.11.2)</b> | <b>GRCh37/hg19: 45,030,472-45,952,091</b><br>maternal; microsatellite analysis<br><br>D11S554- D11S1319<br>D11S554:44,830,234-45,030,472<br>D11S1319:45,952,091-46,152,450                                                           | Biaprietal foramina<br>Global developmental delay<br>Craniofacial abnormalities                         | Micropenis; Esotropia                                                                                                                                                                                                                                                                                                       |
| <b>Patient 2: brother 7y</b>                                                | Not available                                                                                                                                                                                                                        | Biaprietal foramina<br>Multiple exostosis<br>Mental retardation<br>Febrile seizures and <b>Epilepsy</b> | Umbilical hernia                                                                                                                                                                                                                                                                                                            |
| <b>Patient 3: brother 12y</b>                                               | Not available                                                                                                                                                                                                                        | Biaprietal foramina<br>Mental retardation<br>Febrile seizures and <b>Epilepsy</b>                       | Cryptorchidism                                                                                                                                                                                                                                                                                                              |
| <b>12) Wakui et al. 2005</b>                                                |                                                                                                                                                                                                                                      |                                                                                                         |                                                                                                                                                                                                                                                                                                                             |

|              |                                                                                                                                                                                       |                                                                                                   |                                                                                                                                                                                                                                                                                                                                                          |
|--------------|---------------------------------------------------------------------------------------------------------------------------------------------------------------------------------------|---------------------------------------------------------------------------------------------------|----------------------------------------------------------------------------------------------------------------------------------------------------------------------------------------------------------------------------------------------------------------------------------------------------------------------------------------------------------|
| <b>PSS03</b> | <p><b>GRCh37/hg19:42,922,228-44,166,825</b><br/>paternal; FISH/microsatellite markers</p> <p>D11S1355-D11S3805<br/>D11S1355:42921915-42,922,228<br/>D11S3805:44,166,825-44166957</p>  | <p>Biaprietal foramina<br/>Multiple exostosis<br/>Dismorphic features</p>                         | <p>Osteochondroma; Bowing of the lower extremities; Short stature; Brachydactyly</p> <p>at 4 years height, weight, and head circumference were &lt;3<sup>rd</sup>, &lt;3<sup>rd</sup>, and 50<sup>th</sup> percentiles, respectively</p>                                                                                                                 |
| <b>PSS04</b> | <p><b>GRCh37/hg19:44,110,035-48,353,905</b><br/>paternal; FISH/microsatellite markers</p> <p>D11S1121-D11S1180<br/>D11S1121:44109749-44,110,035<br/>D11S1180:48,353,905-48354265</p>  | <p>Biaprietal foramina<br/>Multiple exostosis<br/>Developmental delay<br/>Dismorphic features</p> | <p>Hypotonia; Myopia; Umbilical hernia; Bilateral inguinal hernia; Hypospadias; Micropenis; Multiple upper respiratory tract infections and otitis media; Hypogammaglobinemia; Brachydactyly</p> <p>at 3 years, 10 months his height, weight, and FOC were at the 10<sup>th</sup>, 60<sup>th</sup>, and &lt;5<sup>th</sup> percentiles, respectively</p> |
| <b>PSS08</b> | <p><b>GRCh37/hg19:31,052,844-46,248,029</b><br/>paternal<br/>*position from Kim et al.[1]</p>                                                                                         | <p>Biprietal foramina<br/>Developmental delay<br/>Dysmorphic features</p>                         | <p>Wilms tumor; Aniridia;<br/>Agenesis of corpus callosum</p>                                                                                                                                                                                                                                                                                            |
| <b>PSS10</b> | <p><b>GRCh37/hg19:40,405,682-46,977,776</b><br/>paternal; FISH/microsatellite markers</p> <p>D11S4455- D11S1085<br/>D11S4455:40405393-40,405,682<br/>D11S1085:46,977,776-46978119</p> | <p>Biaprietal foramina<br/>Multiple exostosis<br/>Severe speech delay<br/>Dysmorphic features</p> | <p>Strabismus; Hypoplastic corpus callosum; Short hands and feet; Micropenis<br/><i>Deceased from multiorgan failure</i></p> <p>at 11 years height, weight, and FOC were at 75<sup>th</sup>, 75<sup>th</sup>, and 90<sup>th</sup> percentiles, respectively.</p>                                                                                         |

|                                     |                                                                                                                                                                                                  |                                                                                                                       |                                                                                                                                                                                                                                                                                                                                                                                                            |
|-------------------------------------|--------------------------------------------------------------------------------------------------------------------------------------------------------------------------------------------------|-----------------------------------------------------------------------------------------------------------------------|------------------------------------------------------------------------------------------------------------------------------------------------------------------------------------------------------------------------------------------------------------------------------------------------------------------------------------------------------------------------------------------------------------|
| <p><b>PSS12</b></p>                 | <p><b>GRCh37/hg19:42,922,228-47,133,045</b><br/>paternal; FISH/microsatellite markers</p> <p>D11S1355-D11S2039<br/>D11S1355:42921915- 42,922,228<br/>D11S2039:47,133,045- 47133358</p>           | <p>Parietal foramina<br/>Developmental delay<br/>Dismorphic features</p>                                              | <p>Fingertip anterior fontanel;<br/>Agenesis of corpus callosum;<br/>Bilateral choroid plexus cysts;<br/>Mild to moderate sensorineural hearing loss; Small testis.</p> <p>appropriate for gestational age at 13 months, his weight, length, and head circumference were at the 90<sup>th</sup>, 90<sup>th</sup>, and 40<sup>th</sup> percentiles, respectively</p>                                        |
| <p><b>PSS13</b></p>                 | <p><b>GRCh37/hg19:41,871,599-51,382,783</b><br/>paternal; FISH/microsatellite markers</p> <p>D11S1779-D11S1395<br/>D11S1779:41871194-41,871,599<br/>D11S1395:51,382,783-51383036</p>             | <p>Biparietal foramina<br/>Global developmental delay<br/>Craniofacial anomalies</p>                                  | <p>Hypotonia; Cryptorchidism; Visual impairment with esotropia; Hearing impairment; Ventricular septal defect; Mildly widened CSF spaces<br/>History of multiple otitis media and multiple respiratory infection; Brachydactyly; Short stature</p> <p>intrauterine growth retardation; at age 35 months the patient was below the 5<sup>th</sup> percentile for head circumference, weight, and length</p> |
| <p><b>13) Wuyts et al. 2004</b></p> |                                                                                                                                                                                                  |                                                                                                                       |                                                                                                                                                                                                                                                                                                                                                                                                            |
| <p><b>Patient 1</b></p>             | <p><b>GRCh37/hg19:43,995,113-49,324,458</b><br/><i>de novo</i>; FISH/microsatellite analysis</p> <p>D11S1393- D11S1326<br/>D11S1393:43,994,800-43,995,113<br/>D11S1326:49,324,458-49,324,874</p> | <p>Biaprietal foramina<br/>Multiple exostosis<br/>Facial dimorphisms<br/>Developmental delay<br/>Extreme delay of</p> | <p>Hypotonia; High myopia; Markedly hypoplasia on the cerebellar vermis/ hemispheres; Obesity</p>                                                                                                                                                                                                                                                                                                          |



|                                                                              |                                                                                                                                                                                        |                                                                                                                                                              |                                                                                                                                                                                                                                                                                                                                                                                           |
|------------------------------------------------------------------------------|----------------------------------------------------------------------------------------------------------------------------------------------------------------------------------------|--------------------------------------------------------------------------------------------------------------------------------------------------------------|-------------------------------------------------------------------------------------------------------------------------------------------------------------------------------------------------------------------------------------------------------------------------------------------------------------------------------------------------------------------------------------------|
|                                                                              |                                                                                                                                                                                        | speech development<br>Intellectual disability<br><b>Seizure</b>                                                                                              | normal with birth weight 3000 g (P50) and length 52 cm (P90)<br>at age 21 years her height 160 cm (25<P<50) and her weight 70 kg (P90). Occipital-frontal circumference 54 cm (25<P<50)                                                                                                                                                                                                   |
| <b>Patient 2</b>                                                             | <b>GRCh37/hg19: 42,922,228-44,930,234</b><br><i>de novo</i> ; FISH/microsatellite analysis<br><br>D11S1355- D11S554<br>D11S1355:42,921,915-42,922,228<br>D11S554:44,930,234-44,930,472 | Multiple exostosis<br>Developmental delay<br>Intellectual disability                                                                                         | Hypotonia; Anal atresia; Anal fistula; Ventrally placed anus; Ventricular septal defect; Horizontal nystagmus; Convergent strabismus; Syndactyly; Small hands; Tapering figures<br><br>birth weight and length were 3280 g (P90) and 51cm (P75)<br>age 7 years and 2 months, she was 120 cm tall (25<P<50) and her weight was 23 kg (P50). <b>Head circumference was 48.4 cm (&lt;P3)</b> |
| <b>Patient 3</b><br><i>described by Bartsch 1996 [3] and Lorenz 1990 [4]</i> | <b>GRCh37/hg19:40,974,567-49,324,458</b><br><i>de novo</i> ; FISH/microsatellite analysis<br><br>D11S905- D11S1326<br>D11S905:40974273-40,974,567<br>D11S1326:49,324,458-49324874      | Biaprietal foramina<br>Multiple exostosis<br>Facial dysmorphisms<br>Developmental delay with autistic behavior<br>Intellectual disability<br><b>Seizures</b> | Hypotonia; Myopia; Nystagmus; Strabismus; Blepharophimosis; Meningoencephaloceles; Adipose aspect; Micropenis; Tapering fingers, Simian crease; Acrocephalosyndactyly; Mild cutaneous syndactyly of fingers 2-5; Cone-shaped epiphyses of the middle phalanges; Small hands;                                                                                                              |

|                                                             |                                                                                                                                                                                                                               |                                                                                                                                                                                                 |                                                                                                                                                                                                                                                                                     |
|-------------------------------------------------------------|-------------------------------------------------------------------------------------------------------------------------------------------------------------------------------------------------------------------------------|-------------------------------------------------------------------------------------------------------------------------------------------------------------------------------------------------|-------------------------------------------------------------------------------------------------------------------------------------------------------------------------------------------------------------------------------------------------------------------------------------|
|                                                             |                                                                                                                                                                                                                               |                                                                                                                                                                                                 | born at term (birth weight 2,950 g, length 49 cm);<br>at 14 years height was approximately 143cm (<P3), weight 25 kg (<P5), and head circumference 50cm (<P3).                                                                                                                      |
| <b>14) Chien et al. 2003</b><br><i>three family members</i> | <b>GRCh37/hg19:41,871,599-49,324,458</b><br>maternal; FISH/microsatellite markers<br><br>*position from Wakui et al, patient PSS07 [5]<br>D11S1779-D11S1326<br>D11S1779:41871194-41,871,599<br>D11S1326:49,324,458-49324874   | Bilateral parietal foramina<br>Developmental delay<br>Abnormal craniofacial appearance<br><br>*mother's brothers suffered from febrile seizures <b>epilepsy</b> and had intellectual disability | Hypotonia; Esotropia; Mild ventriculomegaly; Thin corpus callosum; Micropenis;<br><br>* mother's brothers the 12-year-old brother had right-side cryptorchidism, whereas the 7-year-old brother umbilical hernia. their CT revealed thin corpus callosum and mild ventriculomegaly. |
| <b>15) Hall et al. 2001</b>                                 |                                                                                                                                                                                                                               |                                                                                                                                                                                                 |                                                                                                                                                                                                                                                                                     |
| <i>Patient 7626</i>                                         | <b>GRCh37/hg19:43,878,160-45,063,096</b><br>maternal; FISH/microsatellite markers<br><br>*position from Wakui et al, patient PSS05 [5]<br>RH13886-SHGC-85351<br>RH13886:43877855-43,878,160<br>SHGC-85351:45,063,096-45063446 | Parietal Foramina<br>Multiple Exsostosis                                                                                                                                                        |                                                                                                                                                                                                                                                                                     |
| <i>Patient 7625</i>                                         | <b>GRCh37/hg19:43,878,160-45,063,096</b><br>paternal; FISH/microsatellite markers<br><br>*position from Wakui et al, [5]<br>RH13886-SHGC-85351                                                                                | Biaprietal foramina<br>Multiple exostosis                                                                                                                                                       | Asthma;<br>Short stature;<br>Hyperactivity                                                                                                                                                                                                                                          |

|                                  |                                                                                                                        |                                                                                                                                       |                                                                                                                                                                                                                                        |
|----------------------------------|------------------------------------------------------------------------------------------------------------------------|---------------------------------------------------------------------------------------------------------------------------------------|----------------------------------------------------------------------------------------------------------------------------------------------------------------------------------------------------------------------------------------|
|                                  | RH13886:43877855-43,878,160<br>SHGC-85351:45,063,096-45063446                                                          |                                                                                                                                       |                                                                                                                                                                                                                                        |
| <b>Patient 7628</b>              | <b>GRCh37/hg19:43,878,160-45,063,096</b><br>paternal; FISH/microsatellite<br>markers                                   | Biaprietal foramina;<br>Multiple exostosis                                                                                            |                                                                                                                                                                                                                                        |
|                                  | *position from Wakui et al, [5]<br>RH13886-SHGC-85351<br>RH13886:43877855-43,878,160<br>SHGC-85351:45,063,096-45063446 |                                                                                                                                       |                                                                                                                                                                                                                                        |
| <b>16) Wuyts et al. 1999</b>     |                                                                                                                        |                                                                                                                                       |                                                                                                                                                                                                                                        |
| <b>Four family members</b>       | <b>GRCh37/hg19:44,146,056-44,278,811</b><br>paternal; FISH/microsatellite<br>markers                                   | Enlarged parietal foramina<br>(Catlin mark)<br>Multiple exostosis<br><b>Seizures</b> (only in the proband)                            | Mild hypoplasia of the occipital lobe,<br>vermis, and cerebellar hemispheres<br>*brain CT performed only in two<br>patients                                                                                                            |
|                                  | D11S903-D11S2095<br>D11S903:44,145,910 44,146,056<br>D11S2095:44,278,811-44278923                                      |                                                                                                                                       |                                                                                                                                                                                                                                        |
| <b>17) Bartsch et al. 1996</b>   |                                                                                                                        |                                                                                                                                       |                                                                                                                                                                                                                                        |
| <b>Patient 2</b>                 | <b>GRCh37/hg19:36,023,482-46,166,860</b><br>unknown; microsatellite analysis                                           | Multiple exostoses<br>Severe mental retardation<br>Mild facial dysmorphism<br><b>Focal seizures developed later<br/>into epilepsy</b> | Marked muscular hypotonia;<br>Strabismus; Nystagmus;<br>Adipose appirance; Micropenis;<br>Tapered fingers<br><br>birth and postnatal growth parameters<br>(weight, length, and occipitofrontal<br>circumference) within normal limits. |
|                                  | D11S935-D11S1344<br>D11S935:36023164- 36,023,482<br>D11S1344:46,166,860- 46167226                                      |                                                                                                                                       |                                                                                                                                                                                                                                        |
| <b>Patient 6-8<br/>6-proband</b> | <b>GRCh37/hg19:44,146,056-44,930,234</b><br>unknown; microsatellite analysis                                           | 6/7/8- Multiple exostosis<br>Parietal foramina                                                                                        | 6 – Cafe-au-lait spots on the trunk;<br>Capillary hemangioma on the left                                                                                                                                                               |

|                                                                 |                                                                                           |                                                                                                                                             |                                                                                                                                                                                                                                                                                                   |
|-----------------------------------------------------------------|-------------------------------------------------------------------------------------------|---------------------------------------------------------------------------------------------------------------------------------------------|---------------------------------------------------------------------------------------------------------------------------------------------------------------------------------------------------------------------------------------------------------------------------------------------------|
| <p><i>7-maternal grandmother</i><br/><i>8-maternal aunt</i></p> | <p>D11S903-D11S554<br/>D11S903:44145910-44,146,056<br/>D11S554:44,930,234-44930472</p>    | <p>shoulder; Mild bilateral fifth finger clinodactyly;<br/>History of self-abusive behavior and hyperactivity;<br/>8-Adipose appearance</p> |                                                                                                                                                                                                                                                                                                   |
| <p>18) Potocky et al. 1996</p>                                  | <p>GRCh37/hg19:40,477,655-46,085,228 paternal<br/>*position from Kim et al, PSS02 [1]</p> | <p>Multiple exostosis<br/>Parietal foramina<br/>Mental retardation<br/>Mild global developmental delay<br/>Craniofacial anomalies</p>       | <p>Alternating esotropia;<br/>Bilateral ptosis;<br/>Short stature<br/><br/>at 9 years of age her height, weight, and head circumference were at the both, 60<sup>th</sup>, and 80<sup>th</sup> centiles, respectively.</p>                                                                        |
| <p>19) McGaughran et al. 1995<br/>(WAGR+PSS)</p>                | <p>Not available</p>                                                                      | <p>Multiple exostosis<br/>Parietal foramina<br/>Global developmental delay<br/>Mental retardation</p>                                       | <p>Bilateral aniridia; Wilms tumor;<br/>Glomerulonephritis;<br/>Bilateral simian crease; Lens Opacities;<br/>Glaucoma; Poor vision; Hypospadias;<br/>Undescended testes; Micropenis;<br/>Triradiate pelvis; Platyspondyly;<br/>Hypogammaglobinemia;<br/><br/>weighed 3700 g at birth at term;</p> |

|                                                                 |                                                                                                                                                                                                                              |                                                                                                                                           |                                                                                                                                                                                                                                                                                                                                                                                                                                                                                                 |
|-----------------------------------------------------------------|------------------------------------------------------------------------------------------------------------------------------------------------------------------------------------------------------------------------------|-------------------------------------------------------------------------------------------------------------------------------------------|-------------------------------------------------------------------------------------------------------------------------------------------------------------------------------------------------------------------------------------------------------------------------------------------------------------------------------------------------------------------------------------------------------------------------------------------------------------------------------------------------|
|                                                                 |                                                                                                                                                                                                                              |                                                                                                                                           | 26 years: height is 150cm (<3 <sup>rd</sup> centile) and his weight is 70 kg (75 <sup>th</sup> centile).                                                                                                                                                                                                                                                                                                                                                                                        |
| <b>20) Shaffer et al. 1993</b><br><i>III-1</i><br><i>prband</i> | <b>GRCh37/hg19:44,110,035-48,353,905</b><br>maternal; FISH/microsatellite markers<br><br>*position from Wakui et al, patient PSS01 [5]<br>D11S1121-D11S1180<br>D11S1121:44109749-44,110,035<br>D11S1180:48,353,905- 48354265 | Multiple exostosis<br>Biparietal foramina<br>Severe mental retardation<br>Craniofacial dysostosis<br><b>Epilepsy</b><br>Autistic features | Hypotonia; Borderline hypotiroidisam; (elevated TSH and low normal T4); Delayed/failed puberty; “Awkward,” ataxic gait; Choroid plexus cyst; Prominent CSF spaces; Several anatomic variants of the cerebral arteriovenous system; Microcytic anemia; Estropia; Myopia; Heterotropia; Simian crease; Leg-length discrepancy and osteopenia; Sleep disturbances; Brachydactyly;<br><br>Small for gestational age; fifth centile for height, weight, and head circumference throughout childhood. |
| <i>III-2</i><br><i>proband's brother</i>                        | <b>GRCh37/hg19:44,110,035-48,353,905</b><br>maternal; FISH/microsatellite markers<br><br>*position from Wakui et al, [5]<br>D11S1121-D11S1180<br>D11S1121:44109749-44,110,035<br>D11S1180:48,353,905- 48354265               | Multiple exostosis<br>Severe mental retardation<br>Craniofacial dysostosis                                                                | Hypotonia<br>Low normal T4, borderline high TSH;                                                                                                                                                                                                                                                                                                                                                                                                                                                |

|                                           |                                                                                                                       |                                                                                                                                                |                                                                                                                                                                                                                                                                           |
|-------------------------------------------|-----------------------------------------------------------------------------------------------------------------------|------------------------------------------------------------------------------------------------------------------------------------------------|---------------------------------------------------------------------------------------------------------------------------------------------------------------------------------------------------------------------------------------------------------------------------|
| <b>II-4</b><br><i>maternal half uncle</i> | <b>GRCh37/hg19:44,110,035-48,353,905</b><br>unknown; FISH/microsatellite<br>markers                                   | Multiple exostosis<br>Biparietal foramina<br>Severe mental retardation<br>Aggressive and self-injurious<br>behavior<br>Craniofacial dysostosis | Hypotonia; Micropenis;<br>Cryptorchidism; Madelung deformity;<br>Sensorineural hearing loss; Strabismus;<br>Mild-to-moderate myopia; Simian<br>crease; Mega cisterna magna or a<br>posterior fossa cyst resulting in mild<br>cerebellar hypoplasia; Adipose<br>appearance |
|                                           | *position from Wakui et al, [5]<br>D11S1121-D11S1180<br>D11S1121:44109749-44,110,035<br>D11S1180:48,353,905- 48354265 | <b>Seizures</b>                                                                                                                                |                                                                                                                                                                                                                                                                           |

Note: ArrayCGH-comparative genomic hybridization; FISH- Fluorescence in situ hybridization; FOC- Frontal-Occipital Circumference;

Legend: blue: growth parameters  $\geq 90^{\text{th}}$  percentile; brown: growth parameters  $\leq 10^{\text{th}}$  percentile; violet: WAGR symptoms

- (1) Kim, H. G.; Kim, H. T.; Leach, N. T.; Lan, F.; Ullmann, R.; Silahtaroglu, A.; Kurth, I.; Nowka, A.; Seong, I. S.; Shen, Y.; Talkowski, M. E.; Ruderfer, D.; Lee, J. H.; Glotzbach, C.; Ha, K.; Kjaergaard, S.; Levin, A. V.; Romeike, B. F.; Kleefstra, T.; Bartsch, O.; Elsea, S. H.; Jabs, E. W.; MacDonald, M. E.; Harris, D. J.; Quade, B. J.; Ropers, H. H.; Shaffer, L. G.; Kutsche, K.; Layman, L. C.; Tommerup, N.; Kalscheuer, V. M.; Shi, Y.; Morton, C. C.; Kim, C. H.; Gusella, J. F. Translocations Disrupting PHF21A in the Potocki-Shaffer-Syndrome Region Are Associated with Intellectual Disability and Craniofacial Anomalies. *Am. J. Hum. Genet.* **2012**, *91* (1), 56–72. <https://doi.org/10.1016/j.ajhg.2012.05.005>.
- (2) Crolla, J. A.; Van Heyningen, V. Frequent Chromosome Aberrations Revealed by Molecular Cytogenetic Studies in Patients with Aniridia. *Am. J. Hum. Genet.* **2002**, *71* (5), 1138–1149. <https://doi.org/10.1086/344396>.
- (3) Oliver Bartsch, Wim Wuyts, Wim Van Hul, Jacqueline T. Hecht, P. M.; Debra Hogue, Walter Werner, Bernard Zabel, Georg K. Hinkel, C. M. P.; Lisa G. Shaffer, and P. J. W. Delineation of a Contiguous Gene Syndrome With Multiple Exostoses, Enlarged Parietal Foramina, Craniofacial Dysostosis, and Mental Retardation, Caused by Deletions in the Short Arm of Chromosome 11. *Am. J. Hum. Genet.* **1996**, No. 58, 734–732.
- (4) Lorenz, P.; Rupperecht, E.; Tellkamp, H. An Unusual Type of Acrocephalosyndactyly with Bilateral Parietooccipital “Encephalocele”, Micropenis, and Severe Mental Retardation. *Am. J. Med. Genet.* **1990**, *36* (3), 265–268. <https://doi.org/10.1002/ajmg.1320360302>.
- (5) Wakui, K.; Gregato, G.; Ballif, B. C.; Glotzbach, C. D.; Bailey, K. A.; Kuo, P. L.; Sue, W. C.; Sheffield, L. J.; Irons, M.; Gomez, E. G.; Hecht, J. T.; Potocki, L.; Shaffer, L. G. Construction of a Natural Panel of 11p11.2 Deletions and Further Delineation of the Critical Region Involved in Potocki-Shaffer Syndrome. *Eur. J. Hum. Genet.* **2005**, *13* (5), 528–540. <https://doi.org/10.1038/sj.ejhg.5201366>.

**Table 2.** Summary statistics of the clinical presentation

| <b>Clinical presentation</b> | <i>n</i> | %  | <b>PSS</b> | <i>ALX/EXT4</i> | <i>PHF21A</i> |
|------------------------------|----------|----|------------|-----------------|---------------|
| Developmental delay          | 22       | 55 | 17         | 2               | 3             |
| Intellectual disability      | 21       | 53 | 17         | 2               | 2             |
| Language delay               | 3        | 8  | 3          | 0               | 0             |
| Hypotonia                    | 16       | 40 | 14         | 1               | 1             |
| Epilepsy                     | 14       | 35 | 12         | 1               | 1             |
| Corpus callosum              | 8        | 20 | 8          | 0               | 0             |
| Prominent CSF spaces         | 6        | 15 | 6          | 0               | 0             |
| Other brain anomalies        | 9        | 23 | 6          | 2               | 1             |
| Micropenis                   | 9        | 31 | 8          | 0               | 1             |
| Cryptorchidism               | 8        | 28 | 8          | 0               | 0             |
| Cataract                     | 2        | 5  | 1          | 1               | 0             |
| Strabismus                   | 12       | 30 | 10         | 2               | 0             |
| Nystagmus                    | 5        | 13 | 4          | 1               | 0             |
| Hearing loss                 | 4        | 10 | 4          | 0               | 0             |
| <b>TOTAL</b>                 | 40       |    |            |                 |               |

| First author                         | Dysmorphic features                                                                                                                                                                                    |                                                                                                       |
|--------------------------------------|--------------------------------------------------------------------------------------------------------------------------------------------------------------------------------------------------------|-------------------------------------------------------------------------------------------------------|
|                                      | characteristic                                                                                                                                                                                         | additional                                                                                            |
| 1) Decipher patient 286390           | high and broad forehead, sparse lateral eyebrows, long nose with prominent nasal bridge, short and smooth philtrum, thin lips, short neck                                                              | prominent chin with horizontal crease, large mouth                                                    |
| 2) Decipher patient 415213           |                                                                                                                                                                                                        | mild turriccephaly                                                                                    |
| 3) McCool et al. 2017                | broad forehead, sparse eyebrows                                                                                                                                                                        | triangular face, mid-facial hypoplasia, narrowed nasal bridge, mild retrognathia                      |
| 4) Labonne et al. 2015               | brachycephaly, broad forehead, mild epicanthic folds, broad flat nasal bridge with a full nasal tip, large posteriorly rotated ears, full cheeks, mild micrognathia, small mouth with a thin upper lip | scaphocephaly, slightly prominent metopic ridge, mild malar hypoplasia                                |
| 5) Sohn et al. 2014                  | microcephaly, sparse eyebrows, prominent nasal bridge, hypoplastic nare, down turned mouth, high arched palate                                                                                         |                                                                                                       |
| 6) Kim et al. 2012<br><i>GM14361</i> | microcephaly, epicanthal fold, micrognathia, small mouth                                                                                                                                               | short forehead, flat midface, flat occiput, bulbous nasal tip, depressed nasal root, protuberant ears |
| 7) Montgomery et al. 2012            | partial right epicanthal fold, short philtrum                                                                                                                                                          | thin upper lip vermilion, faint philtral groove                                                       |
| 8) Palka et al. 2012                 | high forehead, laterally sparse eyebrows, hypoplastic alae nasi, thin lips, short philtrum                                                                                                             | upslanting palpebral fissures                                                                         |



|                                |                                                                                                                                                  |                                                                                                                                                         |
|--------------------------------|--------------------------------------------------------------------------------------------------------------------------------------------------|---------------------------------------------------------------------------------------------------------------------------------------------------------|
| <b>9) Romeike et al. 2007</b>  | microcephaly, brachycephaly, broad forehead                                                                                                      | hypotelorism abnormal position of the eyelids, thin palpebral fissures, dysplastic low set ears, very thin lips, long narrow nose, hypoplastic mandible |
| <b>10) Bremond et al. 2005</b> |                                                                                                                                                  |                                                                                                                                                         |
| <i>Patient 1 (WAGR+PSS)</i>    | micrognathia                                                                                                                                     | downslanted palpebral fissures, low set ears, patulous lips, flat malar areas, crowded teeth                                                            |
| <b>11) Chuang et al. 2005</b>  |                                                                                                                                                  |                                                                                                                                                         |
| <i>Patient 1</i>               | brachycephaly, downturned mouth angle                                                                                                            | frontal bossing, mild upslanting palpebral fissures, low set ears with mild helix dysplasia                                                             |
| <b>12) Wakui et al. 2005</b>   |                                                                                                                                                  |                                                                                                                                                         |
| <i>PSS03</i>                   | brachycephaly, short philtrum                                                                                                                    | macrocephaly                                                                                                                                            |
| <i>PSS04</i>                   | brachycephaly, microcephaly, sparse lateral eyebrows, epicanatal folds, prominent nasal bridge, prominent nose, short philtrum, downturned mouth | protuberant ears                                                                                                                                        |
| <i>PSS08</i>                   | brachycephaly, sparse lateral eyebrows, epicanthal fold, prominent nasal bridge, prominent nose, downturned mouth                                |                                                                                                                                                         |
| <i>PSS10</i>                   | brachycephaly, epicanthal fold, prominent nasal bridge, downturned mouth                                                                         | short palpebral fissures, deep set eyes                                                                                                                 |
| <i>PSS12</i>                   | brachycephaly, broad forehead, sparse lateral eyebrows, prominent nasal bridge,                                                                  | small nose                                                                                                                                              |

|                                                                      |                                                                                                                                                                        |                                                                                                                                                                                                                           |
|----------------------------------------------------------------------|------------------------------------------------------------------------------------------------------------------------------------------------------------------------|---------------------------------------------------------------------------------------------------------------------------------------------------------------------------------------------------------------------------|
|                                                                      | hypoplasia of the nares, short philtrum, downturned mouth                                                                                                              |                                                                                                                                                                                                                           |
| <b>PSS13</b>                                                         | microcephaly, brachycephaly, sparse lateral eyebrows, broad forehead, prominent nasal bridge, hypoplastic alae nase, short philtrum, downturned mouth                  | polygonocephaly, prominent nose                                                                                                                                                                                           |
| <b>13) Wuyts et al. 2004</b>                                         |                                                                                                                                                                        |                                                                                                                                                                                                                           |
| <b>Patient 1</b>                                                     | brachycephaly, high forehead                                                                                                                                           | turriccephaly, large ears, left facial asymmetry, small flat nose, narrow maxilla, prominent high chin                                                                                                                    |
| <b>Patient 2</b>                                                     | brachycephaly, high and broad forehead, epicanthus, hypoplastic alar wings, upslant of palpebral fissures,                                                             | prominent glabella, medially prominent forehead, occiput appeared flat, temporal narrowing, large ears, narrow pointed nose, full cheeks, prominent chin, small teeth, diastemata between maxillar and manibular incisive |
| <b>Patient 3</b><br><i>Described by Bartsch 1996 and Lorenz 1990</i> | brachycephaly, broad and high forehead, small upturned nose with broad tip, broad nasal bridge, hypoplastic alae nasi, downturned mouth corners, epicanthus, short nec | mild turriccephaly, hypertelorism, antimongoloid eye slants, telecanthus                                                                                                                                                  |
| <b>14) Chien et al. 2003</b>                                         | down-turned mouth;                                                                                                                                                     | frontal bossing; low set ears; mild Mongolian eyeslants (upslanting palpebral fissures), mild helix dysplasia                                                                                                             |
| <b>17) Bartsch et al. 1996</b>                                       |                                                                                                                                                                        |                                                                                                                                                                                                                           |

|                                                                  |                                                                                                                                                                                                                         |                                                                |
|------------------------------------------------------------------|-------------------------------------------------------------------------------------------------------------------------------------------------------------------------------------------------------------------------|----------------------------------------------------------------|
| <i>Patient 2</i>                                                 | brachycephaly, high and broad forehead, broad nose tip, downturned mouth, short neck                                                                                                                                    | slight mongoloid (upslanting) eye slants, small nose           |
| <i>Patient 6-8</i>                                               | 6-high forehead                                                                                                                                                                                                         |                                                                |
| <b>18) Potocki et al. 1996</b>                                   | brachycephaly, epicanthal folds, prominent nasal bridge, short philtrum, downturned upper lip                                                                                                                           |                                                                |
| <b>19) McGaughran et al. 1995</b>                                | broad and short neck                                                                                                                                                                                                    | coarse facies, buphthalmus, posteriorly angulated low set ears |
| <b>20) Shaffer et al. 1993</b><br><i>III-1</i><br><i>proband</i> | brachymicrocephaly, epicanthus, high and broad forehead, sparse lateral eyebrows, downturned mouth, prominent nasal bridge, prominent nose; short philtrum; broad/depressed nasal tip; micrognathia (mild)              | telecanthus                                                    |
| <i>III-2</i><br><b>proband's brother</b>                         | broad nasal bridge, epicanthus, brachymicrocephaly, (high and broad forehead, downturned mouth, small upturned nose with a broad tip and hypoplastic alae nasi (additional information from Bartsch et.al) <sup>1</sup> | telecanthus                                                    |
| <i>II-4</i><br><b>maternal half uncle</b>                        | brachymicrocephaly, epicanthus, high and broad forehead; broad/depressed nasal tip; prominent nasal bridge; short philtrum; downturned mouth                                                                            | telecanthus                                                    |

(1) O Bartsch , W Wuyts, W Van Hul, J T Hecht, P Meinecke, D Hogue, W Werner, B Zabel, G K Hinkel, C M Powell, L G Shaffer, P. J. W. Delineation of a Contiguous Gene Syndrome With Multiple Exostoses, Enlarged Parietal Foramina, Craniofacial

Dysostosis, and Mental Retardation, Caused by Deletions in the Short Arm of Chromosome 11. *Am. J. Hum. Genet.* **1996**, 58 (4), 734–742.
